# Supplementary material for: Potential surrogate plants for use in semi-field pesticide risk assessment with Megachile rotundata
Source: PeerJ. 2019 Jan 18;6:e6278. doi: 10.7717/peerj.6278 (PMC6340348; doi:10.7717/peerj.6278)
Supplement: Data S1 [file peerj-07-6278-s002.xlsx]

## Sheet: behaviour data
surrogate plant	date	observation time	replicate	female release rate	temperature C	average number of active adults	number of resting females	number of foraging trips
alfalfa	2016-07-29	13:51:00	1	10	31	7.5	0	7
alfalfa	2016-07-29	11:34:00	1	10	32	6.75	0	4
alfalfa	2016-07-29	10:00:00	1	10	29	8.5	0	1
alfalfa	2016-08-01	10:07:00	1	10	27	0.25	0	0
alfalfa	2016-08-03	11:03:00	1	10	30	10.25	0	3
alfalfa	2016-08-03	12:33:00	1	10	33	6.75	1	0
alfalfa	2016-08-03	15:02:00	1	10	31	6.5	0	4
alfalfa	2016-08-05	10:29:00	1	10	31	3.25	0	1
alfalfa	2016-08-05	12:06:00	1	10	39	3.75	0	2
alfalfa	2016-08-05	14:41:00	1	10	35	4.25	1	3
alfalfa	2016-08-08	10:30:00	1	10	32	2.25	0	0
alfalfa	2016-08-08	12:47:00	1	10	32	2	0	2
alfalfa	2016-08-08	14:25:00	1	10	34	2	0	2
alfalfa	2016-08-10	10:26:00	1	10	32	1.75	0	0
alfalfa	2016-08-10	11:28:00	1	10	39	3	0	0
alfalfa	2016-08-10	13:24:00	1	10	32	2	0	0
alfalfa	2016-08-15	15:32:00	1	10	31	0	0	0
alfalfa	2016-08-15	12:46:00	1	10	31	2	0	1
alfalfa	2016-08-15	10:31:00	1	10	22	0	0	0
alfalfa	2016-07-29	13:36:00	2	10	32	3.5	1	2
alfalfa	2016-07-29	11:38:00	2	10	32	7.75	0	4
alfalfa	2016-07-29	09:36:00	2	10	26	6	3	1
alfalfa	2016-08-01	09:37:00	2	10	25	0	3	0
alfalfa	2016-08-03	10:48:00	2	10	32	11.75	2	3
alfalfa	2016-08-03	12:44:00	2	10	29	9.25	0	6
alfalfa	2016-08-03	14:47:00	2	10	35	11.5	0	8
alfalfa	2016-08-05	10:39:00	2	10	30	10.5	2	2
alfalfa	2016-08-05	11:54:00	2	10	34	9.5	0	5
alfalfa	2016-08-05	14:18:00	2	10	40	11.25	0	6
alfalfa	2016-08-08	10:03:00	2	10	23	4	1	3
alfalfa	2016-08-08	11:53:00	2	10	34	5.25	0	0
alfalfa	2016-08-08	14:39:00	2	10	31	6	0	1
alfalfa	2016-08-10	10:12:00	2	10	36	6.25	0	2
alfalfa	2016-08-10	11:27:00	2	10	33	3.75	0	2
alfalfa	2016-08-10	13:25:00	2	10	40	5	0	1
alfalfa	2016-08-15	12:17:00	2	10	30	0	0	0
alfalfa	2016-08-15	10:57:00	2	10	27	0	0	0
alfalfa	2016-08-15	15:05:00	2	10	30	0	0	0
alfalfa	2016-07-29	13:08:00	3	10	31	4.5	0	5
alfalfa	2016-07-29	11:10:00	3	10	33	4.25	0	0
alfalfa	2016-07-29	09:55:00	3	10	28	7.25	0	4
alfalfa	2016-08-01	09:48:00	3	10	26	0	4	0
alfalfa	2016-08-03	10:18:00	3	10	27	10	0	3
alfalfa	2016-08-03	12:30:00	3	10	29	9.25	0	5
alfalfa	2016-08-03	15:20:00	3	10	35	11.25	0	4
alfalfa	2016-08-05	10:59:00	3	10	31	10.25	1	3
alfalfa	2016-08-05	12:50:00	3	10	39	11.75	0	6
alfalfa	2016-08-05	14:05:00	3	10	35	11.5	0	8
alfalfa	2016-08-08	10:33:00	3	10	29	10.5	0	3
alfalfa	2016-08-08	12:33:00	3	10	31	11.75	0	3
alfalfa	2016-08-08	14:11:00	3	10	35	11	1	7
alfalfa	2016-08-10	10:54:00	3	10	34	11.25	0	2
alfalfa	2016-08-10	12:09:00	3	10	41	10.75	0	4
alfalfa	2016-08-10	13:51:00	3	10	33	5.25	1	3
alfalfa	2016-08-15	15:05:00	3	10	28	3	0	2
alfalfa	2016-08-15	12:57:00	3	10	31	1	2	1
alfalfa	2016-08-15	11:08:00	3	10	25	0	3	0
alfalfa	2016-07-29	13:23:00	4	10	31	5	0	2
alfalfa	2016-07-29	11:06:00	4	10	31	4	3	4
alfalfa	2016-07-29	09:26:00	4	10	30	5.25	0	0
alfalfa	2016-08-01	10:15:00	4	10	27	0.75	2	0
alfalfa	2016-08-03	10:33:00	4	10	29	9.25	0	1
alfalfa	2016-08-03	13:00:00	4	10	33	14.5	0	8
alfalfa	2016-08-03	15:17:00	4	10	31	12.5	0	4
alfalfa	2016-08-05	11:09:00	4	10	23	10.25	0	4
alfalfa	2016-08-05	12:43:00	4	10	35	11	0	3
alfalfa	2016-08-05	14:48:00	4	10	42	11.25	0	0
alfalfa	2016-08-08	10:01:00	4	10	30	5	0	0
alfalfa	2016-08-08	12:05:00	4	10	32	7.25	0	1
alfalfa	2016-08-08	14:09:00	4	10	33	3.75	0	3
alfalfa	2016-08-10	10:41:00	4	10	40	7.5	0	5
alfalfa	2016-08-10	12:09:00	4	10	38	8.5	1	4
alfalfa	2016-08-10	13:53:00	4	10	36	7.5	0	6
alfalfa	2016-08-15	15:36:00	4	10	31	2	3	1
alfalfa	2016-08-15	12:17:00	4	10	31	1.75	0	1
alfalfa	2016-08-15	10:46:00	4	10	24	0	3	0
alfalfa	2016-07-29	13:37:00	1	20	30	7	0	2
alfalfa	2016-07-29	11:21:00	1	20	31	5	1	2
alfalfa	2016-07-29	10:13:00	1	20	33	11.5	2	1
alfalfa	2016-08-01	10:23:00	1	20	27	1.5	0	2
alfalfa	2016-08-03	11:02:00	1	20	33	12.25	1	3
alfalfa	2016-08-03	11:47:00	1	20	32	10.25	0	3
alfalfa	2016-08-03	14:30:00	1	20	35	7.75	0	4
alfalfa	2016-08-05	10:24:00	1	20	28	7.5	2	4
alfalfa	2016-08-05	12:27:00	1	20	35	7.25	1	3
alfalfa	2016-08-05	14:32:00	1	20	41	10.25	0	2
alfalfa	2016-08-08	10:48:00	1	20	31	3.25	0	0
alfalfa	2016-08-08	11:39:00	1	20	31	2.25	0	2
alfalfa	2016-08-08	14:54:00	1	20	31	4.75	0	2
alfalfa	2016-08-10	10:27:00	1	20	38	5.5	0	1
alfalfa	2016-08-10	11:42:00	1	20	34	2.5	0	0
alfalfa	2016-08-10	14:08:00	1	20	40	5.25	0	0
alfalfa	2016-08-15	15:19:00	1	20	30	1	2	2
alfalfa	2016-08-15	12:04:00	1	20	28	0	1	0
alfalfa	2016-08-15	10:32:00	1	20	23	0	2	0
alfalfa	2016-07-29	11:08:00	2	20	31	11	0	8
alfalfa	2016-07-29	10:56:00	2	20	32	3.5	2	3
alfalfa	2016-07-29	09:42:00	2	20	30	7.75	0	1
alfalfa	2016-08-01	10:02:00	2	20	27	0.25	7	0
alfalfa	2016-08-03	10:32:00	2	20	30	22.25	1	4
alfalfa	2016-08-03	12:01:00	2	20	31	13.25	0	2
alfalfa	2016-08-03	15:03:00	2	20	35	18.25	0	5
alfalfa	2016-08-05	11:16:00	2	20	35	13.25	1	11
alfalfa	2016-08-05	13:04:00	2	20	40	12.5	0	7
alfalfa	2016-08-05	14:58:00	2	20	35	5.75	1	6
alfalfa	2016-08-08	10:17:00	2	20	27	6.25	0	2
alfalfa	2016-08-08	12:20:00	2	20	38	11.75	0	3
alfalfa	2016-08-08	14:25:00	2	20	31	10.5	0	4
alfalfa	2016-08-10	10:10:00	2	20	29	7.25	0	3
alfalfa	2016-08-10	13:38:00	2	20	33	4.25	2	2
alfalfa	2016-08-10	12:38:00	2	20	40	5	0	0
alfalfa	2016-08-15	15:18:00	2	20	30	0	1	0
alfalfa	2016-08-15	12:59:00	2	20	31	0.5	0	0
alfalfa	2016-08-15	10:43:00	2	20	28	0	0	0
alfalfa	2016-08-15	14:50:00	3	20	29	0	3	0
alfalfa	2016-08-15	12:32:00	3	20	31	1	0	0
alfalfa	2016-08-15	11:10:00	3	20	27	0	0	0
alfalfa	2016-07-29	13:22:00	3	20	34	10	0	6
alfalfa	2016-07-29	11:22:00	3	20	32	14.25	0	4
alfalfa	2016-07-29	09:42:00	3	20	28	6.25	2	5
alfalfa	2016-08-01	09:37:00	3	20	23	0	15	0
alfalfa	2016-08-03	10:48:00	3	20	29	13.75	0	2
alfalfa	2016-08-03	12:18:00	3	20	33	16.75	0	9
alfalfa	2016-08-03	14:48:00	3	20	33	17.25	0	5
alfalfa	2016-08-05	10:54:00	3	20	34	12.5	3	1
alfalfa	2016-08-05	13:13:00	3	20	35	10.75	2	3
alfalfa	2016-08-05	14:04:00	3	20	37	15.5	0	4
alfalfa	2016-08-08	10:45:00	3	20	31	7.75	1	3
alfalfa	2016-08-08	11:38:00	3	20	32	2.25	0	3
alfalfa	2016-08-08	14:41:00	3	20	34	7.5	2	4
alfalfa	2016-08-10	10:55:00	3	20	40	5	0	2
alfalfa	2016-08-10	12:22:00	3	20	36	3.5	1	0
alfalfa	2016-08-10	13:39:00	3	20	37	3.75	0	1
alfalfa	2016-08-15	14:52:00	4	20	28	1.5	1	0
alfalfa	2016-08-15	12:44:00	4	20	32	0.5	0	0
alfalfa	2016-08-15	10:59:00	4	20	25	0	0	0
alfalfa	2016-07-29	13:49:00	4	20	31	9.75	0	8
alfalfa	2016-07-29	10:53:00	4	20	31	9	0	2
alfalfa	2016-07-29	10:08:00	4	20	28	7.25	1	4
alfalfa	2016-08-01	09:51:00	4	20	25	0.25	0	1
alfalfa	2016-08-03	10:18:00	4	20	26	9.75	0	0
alfalfa	2016-08-03	11:48:00	4	20	32	7.5	0	0
alfalfa	2016-08-03	14:30:00	4	20	36	5.25	0	1
alfalfa	2016-08-05	10:43:00	4	20	31	8.75	0	3
alfalfa	2016-08-05	12:21:00	4	20	39	6.5	0	4
alfalfa	2016-08-05	14:25:00	4	20	35	5.75	0	5
alfalfa	2016-08-08	10:16:00	4	20	32	4.25	0	0
alfalfa	2016-08-08	12:16:00	4	20	31	4.25	0	0
alfalfa	2016-08-08	14:25:00	4	20	36	4.5	0	1
alfalfa	2016-08-10	14:05:00	4	20	32	0.75	0	1
alfalfa	2016-08-10	10:40:00	4	20	33	5.25	1	1
alfalfa	2016-08-10	11:41:00	4	20	42	7	0	1
buckwheat	2016-07-06	09:19:00	1	10	31	23.75	4	0
buckwheat	2016-07-06	11:48:00	1	10	33.3	22.325	1	10
buckwheat	2016-07-06	13:47:00	1	10	31	14.125	0	1
buckwheat	2016-07-08	10:40:00	1	10	30	16.75	3	5
buckwheat	2016-07-08	12:42:00	1	10	31	21.125	1	2
buckwheat	2016-07-08	15:05:00	1	10	35	12.25	0	9
buckwheat	2016-07-11	10:05:00	1	20	26	23.125	4	8
buckwheat	2016-07-11	10:21:00	4	20	30	18.8125	2	9
buckwheat	2016-07-11	10:38:00	2	10	32	12.4375	2	0
buckwheat	2016-07-13	10:34:00	1	10	32	13.625	2	4
buckwheat	2016-07-13	12:07:00	1	10	32	11.625	1	10
buckwheat	2016-07-13	15:05:00	1	10	32	13.1875	2	2
buckwheat	2016-07-15	10:57:00	1	10	30.2	10.325	2	5
buckwheat	2016-07-15	11:43:00	1	10	27.6	6.4125	1	2
buckwheat	2016-07-15	13:38:00	1	10	27.5	5.46875	4	3
buckwheat	2016-07-18	10:27:00	1	10	29.7	7.10625	0	13
buckwheat	2016-07-18	12:12:00	1	10		2.375	0	7
buckwheat	2016-07-18	14:12:00	1	10	33	6.625	0	16
buckwheat	2016-07-20	10:49:00	1	10	31	5.875	0	3
buckwheat	2016-07-20	12:45:00	1	10	31	5.25	0	6
buckwheat	2016-07-20	14:26:00	1	10	33	7.8125	0	4
buckwheat	2016-07-06	09:40:00	2	10	36	23.75	4	3
buckwheat	2016-07-06	12:26:00	2	10	33	23.25	1	1
buckwheat	2016-07-06	14:04:00	2	10	34.3	12.5375	3	1
buckwheat	2016-07-08	10:41:00	2	10	29	14.625	1	0
buckwheat	2016-07-08	12:24:00	2	10	33	16.25	1	3
buckwheat	2016-07-08	14:49:00	2	10	33	21.625	0	0
buckwheat	2016-07-11	12:10:00	1	10	32	6	2	5
buckwheat	2016-07-11	12:25:00	2	20	33	10.25	8	3
buckwheat	2016-07-11	12:55:00	4	10	33	12.4375	0	8
buckwheat	2016-07-13	11:07:00	2	10	35	11.625	0	8
buckwheat	2016-07-13	12:39:00	2	10	33	13.25	1	8
buckwheat	2016-07-13	15:20:00	2	10	32	11.3125	4	1
buckwheat	2016-07-15	10:44:00	2	10	32	7.4375	1	5
buckwheat	2016-07-15	11:43:00	2	10	29.5	5.34375	4	0
buckwheat	2016-07-15	13:26:00	2	10	27	7.1875	2	1
buckwheat	2016-07-18	09:58:00	2	10	27.4	8.5875	3	2
buckwheat	2016-07-18	11:24:00	2	10	32	8.4375	1	6
buckwheat	2016-07-18	13:27:00	2	10	32.8	6.425	1	9
buckwheat	2016-07-20	10:17:00	2	10	26	6.625	4	3
buckwheat	2016-07-20	12:14:00	2	10	32	8.875	2	4
buckwheat	2016-07-20	14:25:00	2	10	33	5.25	0	11
buckwheat	2016-07-20	14:56:00	2	20	32	9.125	1	19
buckwheat	2016-07-06	10:04:00	3	10	33	25.5	1	0
buckwheat	2016-07-06	12:07:00	3	10	35.7	22.675	0	5
buckwheat	2016-07-06	14:04:00	3	10	32	15.5	1	0
buckwheat	2016-07-08	10:59:00	3	10	30	14.375	0	1
buckwheat	2016-07-08	13:00:00	3	10	34	14.8125	0	3
buckwheat	2016-07-11	13:09:00	3	20	32.6	12.0375	3	18
buckwheat	2016-07-11	12:39:00	3	10	33	6.5625	3	4
buckwheat	2016-07-11	13:30:00	4	10	32	9	0	6
buckwheat	2016-07-13	10:56:00	3	10	33	15.5	0	1
buckwheat	2016-07-13	12:55:00	3	10	35	11.375	0	4
buckwheat	2016-07-13	15:05:00	3	10	34	14.75	1	3
buckwheat	2016-07-08	15:08:00	3	10	33	15.875	0	5
buckwheat	2016-07-15	10:26:00	3	10	30.2	6.825	3	2
buckwheat	2016-07-15	12:13:00	3	10	27	10.25	1	0
buckwheat	2016-07-15	13:12:00	3	10	28.8	5.55	1	0
buckwheat	2016-07-18	09:57:00	3	10	27.2	8.3875	4	1
buckwheat	2016-07-18	11:41:00	3	10		3.625	1	5
buckwheat	2016-07-18	13:56:00	3	10	32.8	5.925	3	4
buckwheat	2016-07-20	10:45:00	3	10	31	5.6875	1	3
buckwheat	2016-07-20	12:00:00	3	10	30	9.5625	0	4
buckwheat	2016-07-20	14:56:00	3	10	33	6.625	0	7
buckwheat	2016-07-06	10:21:00	4	10	36.1	24.275	0	6
buckwheat	2016-07-06	11:49:00	4	10	34	22.75	1	2
buckwheat	2016-07-06	14:39:00	4	10	34.5	14.8125	0	7
buckwheat	2016-07-08	11:13:00	4	10	30	25.75	4	5
buckwheat	2016-07-08	12:23:00	4	10	30	19.75	0	8
buckwheat	2016-07-08	14:33:00	4	10	34	13.8333	2	8
buckwheat	2016-07-11	13:44:00	2	10	33	8.6875	4	4
buckwheat	2016-07-11	14:00:00	2	20	32	14.8125	6	9
buckwheat	2016-07-11	14:14:00	3	20	33	13.0625	5	11
buckwheat	2016-07-13	10:34:00	4	10	33	13.375	4	4
buckwheat	2016-07-13	12:59:00	4	10	35	15.125	0	6
buckwheat	2016-07-13	14:32:00	4	10	34	13.375	0	13
buckwheat	2016-07-15	10:07:00	4	10	29	13.25	2	9
buckwheat	2016-07-15	12:12:00	4	10	28.2	5.5125	4	1
buckwheat	2016-07-15	13:40:00	4	10	29	8.3125	4	4
buckwheat	2016-07-18	10:49:00	4	10		3.75	1	5
buckwheat	2016-07-18	11:57:00	4	10	32.2	7.95	1	5
buckwheat	2016-07-18	13:56:00	4	10	32	6.25	1	10
buckwheat	2016-07-20	11:04:00	4	10	31	7.5	1	3
buckwheat	2016-07-20	12:15:00	4	10	31	6.3125	0	7
buckwheat	2016-07-20	14:39:00	4	10	33	9.75	0	10
buckwheat	2016-07-06	09:16:00	1	20	31.4	26.35	7	5
buckwheat	2016-07-06	12:10:00	1	20	34	26	1	4
buckwheat	2016-07-06	13:47:00	1	20	32.9	15.4875	0	6
buckwheat	2016-07-08	11:17:00	1	20	31	17.125	1	0
buckwheat	2016-07-08	12:38:00	1	20	32	26.5833	0	9
buckwheat	2016-07-08	14:33:00	1	20	33	24	0	14
buckwheat	2016-07-11	11:00:00	1	10	33	11.375	1	7
buckwheat	2016-07-11	10:02:00	4	10	28	11.125	0	1
buckwheat	2016-07-11	10:17:00	3	10	31	10.75	0	2
buckwheat	2016-07-13	11:13:00	1	20	33	15.5	0	13
buckwheat	2016-07-13	12:37:00	1	20	34	24.375	3	18
buckwheat	2016-07-13	14:33:00	1	20	33	17.8125	0	11
buckwheat	2016-07-15	10:00:00	1	20	28.2	10.325	4	10
buckwheat	2016-07-15	11:59:00	1	20	29	7.8125	3	3
buckwheat	2016-07-15	13:24:00	1	20	28.5	6.09375	5	1
buckwheat	2016-07-18	10:41:00	1	20	30.5	9.03125	0	15
buckwheat	2016-07-18	11:25:00	1	20		5.375	0	10
buckwheat	2016-07-18	13:26:00	1	20	35	8.25	0	15
buckwheat	2016-07-20	10:59:00	1	20	31	7.375	0	6
buckwheat	2016-07-20	12:45:00	1	20	32	6.9375	0	15
buckwheat	2016-07-20	14:39:00	1	20	33	7.25	0	16
buckwheat	2016-07-06	09:39:00	2	20	32	25.75	6	2
buckwheat	2016-07-06	12:46:00	2	20	35.9	24.975	1	0
buckwheat	2016-07-06	14:37:00	2	20	31	15.625	0	0
buckwheat	2016-07-08	10:56:00	2	20	30	16.625	2	6
buckwheat	2016-07-08	13:17:00	2	20	32	25.5	2	7
buckwheat	2016-07-08	14:30:00	2	20	32	23.125	0	16
buckwheat	2016-07-11	10:42:00	3	20	31	19.1875	1	9
buckwheat	2016-07-11	11:00:00	2	20	32	16.4375	0	7
buckwheat	2016-07-11	12:02:00	1	20	31	8.3125	0	0
buckwheat	2016-07-13	10:19:00	2	20	30	16.0625	0	4
buckwheat	2016-07-13	12:22:00	2	20	34	19.8125	5	15
buckwheat	2016-07-13	15:20:00	2	20	34	18.3125	2	15
buckwheat	2016-07-15	10:28:00	2	20	32	14.75	0	5
buckwheat	2016-07-15	12:25:00	2	20	27.4	6.15	3	1
buckwheat	2016-07-15	13:12:00	2	20	27	7.1875	6	4
buckwheat	2016-07-18	10:11:00	2	20	28.9	9.55625	3	8
buckwheat	2016-07-18	11:55:00	2	20		4.25	2	12
buckwheat	2016-07-18	13:41:00	2	20	33	7.6875	3	16
buckwheat	2016-07-20	10:17:00	2	20	28	9	0	6
buckwheat	2016-07-20	12:30:00	2	20	31	8.4375	2	11
buckwheat	2016-07-06	10:04:00	3	20	34.2	26.3	6	5
buckwheat	2016-07-06	12:47:00	3	20	33	24.75	0	3
buckwheat	2016-07-06	14:20:00	3	20	33.5	17.8125	1	6
buckwheat	2016-07-08	10:25:00	3	20	28	28.5	1	0
buckwheat	2016-07-08	13:18:00	3	20	33	16	11	11
buckwheat	2016-07-08	14:12:00	3	20	31	26.625	2	6
buckwheat	2016-07-11	12:24:00	4	20	30	10.9375	0	5
buckwheat	2016-07-11	12:45:00	2	10	31	8.8125	0	2
buckwheat	2016-07-11	13:34:00	1	20	30	10.875	0	9
buckwheat	2016-07-13	10:50:00	3	20	34	18.625	2	14
buckwheat	2016-07-13	12:07:00	3	20	31	16.5625	2	13
buckwheat	2016-07-13	14:48:00	3	20	32	14.9375	0	11
buckwheat	2016-07-15	11:02:00	3	20	30	8.4375	3	6
buckwheat	2016-07-15	12:29:00	3	20	28	6.125	2	0
buckwheat	2016-07-15	13:52:00	3	20	28.2	6.2625	2	3
buckwheat	2016-07-18	10:33:00	3	20	30.2	8.3875	2	2
buckwheat	2016-07-18	12:14:00	3	20	31.8	7.8625	4	9
buckwheat	2016-07-18	14:10:00	3	20	32.8	8.2375	2	14
buckwheat	2016-07-20	10:33:00	3	20	30	7.1875	0	3
buckwheat	2016-07-20	12:00:00	3	20	29	8.9375	1	9
buckwheat	2016-07-20	14:10:00	3	20	33	11.125	0	9
buckwheat	2016-07-06	10:24:00	4	20	33	26.25	5	0
buckwheat	2016-07-06	12:23:00	4	20	36.6	25.65		10
buckwheat	2016-07-06	14:43:00	4	20	31	23.125	1	8
buckwheat	2016-07-08	10:26:00	4	20	30	17.125	7	11
buckwheat	2016-07-08	13:00:00	4	20	33	22.5	4	6
buckwheat	2016-07-08	14:50:00	4	20	34	21.3125	0	21
buckwheat	2016-07-11	13:54:00	4	20	30	10.25	4	6
buckwheat	2016-07-11	14:12:00	3	10	30	11.375	0	7
buckwheat	2016-07-11	14:28:00	1	10	31	9.5625	0	5
buckwheat	2016-07-13	10:19:00	4	20	31	19.0625	5	8
buckwheat	2016-07-13	12:22:00	4	20	32	18.9375	1	15
buckwheat	2016-07-13	14:47:00	4	20	34	24.25	1	11
buckwheat	2016-07-15	10:41:00	4	20	30.6	11.35	1	9
buckwheat	2016-07-15	11:58:00	4	20	29.1	6.19375	7	3
buckwheat	2016-07-15	13:54:00	4	20	29	7.875	2	1
buckwheat	2016-07-18	10:14:00	4	20	30.1	9.75625	1	3
buckwheat	2016-07-18	11:41:00	4	20	31.8	10.925	0	21
buckwheat	2016-07-18	13:41:00	4	20	33.7	9.79375	1	17
buckwheat	2016-07-20	10:31:00	4	20	28	7.75	1	9
buckwheat	2016-07-20	12:29:00	4	20	31	12.8125	1	18
buckwheat	2016-07-20	14:10:00	4	20	33	8.3125	1	18
purple tansy	2017-08-14	14:05:00	4	10	55.4145	1.75	0	5
purple tansy	2017-08-14	14:19:00	3	10	55.124	2.75	0	7
purple tansy	2017-08-14	14:31:00	1	10	50.1295	3.25	2	17
purple tansy	2017-08-14	14:45:00	2	10	50.795	2.5	0	10
purple tansy	2017-08-14	10:07:00	3	10	69.059	1	5	0
purple tansy	2017-08-14	10:22:00	2	10	64.724	2.25	2	1
purple tansy	2017-08-14	10:36:00	1	10	60.93	1	3	1
purple tansy	2017-08-14	11:00:00	4	10	55.85	3.5	0	7
purple tansy	2017-08-14	12:02:00	2	10	52.3065	5.25	0	9
purple tansy	2017-08-14	12:18:00	3	10	50.114	5	0	6
purple tansy	2017-08-14	12:32:00	4	10	51.7275	3.25	0	6
purple tansy	2017-08-14	12:48:00	1	10	49.271	4.5	0	10
purple tansy	2017-08-18	09:57:00	1	10	84.9725	0	4	1
purple tansy	2017-08-18	10:12:00	4	10	83.6545	3	0	1
purple tansy	2017-08-18	10:25:00	3	10	81.631	1.25	3	4
purple tansy	2017-08-18	09:38:00	2	10	89.602	0	3	0
purple tansy	2017-08-18	11:32:00	1	10	75.2945	3.25	2	0
purple tansy	2017-08-18	11:45:00	3	10	75.993	1.25	4	3
purple tansy	2017-08-18	11:58:00	2	10	72.189	2	0	0
purple tansy	2017-08-18	12:11:00	4	10	76.9955	0	0	0
purple tansy	2017-08-20	10:13:00	3	10	81.7275	0.5	4	0
purple tansy	2017-08-20	10:26:00	2	10	78.2845	3.75	2	0
purple tansy	2017-08-20	10:40:00	4	10	75.3045	3	1	6
purple tansy	2017-08-20	10:53:00	1	10	75.5105	4.75	1	4
purple tansy	2017-08-20	11:37:00	2	10	68.5545	2.5	2	2
purple tansy	2017-08-20	11:53:00	1	10	66.054	5.75	1	4
purple tansy	2017-08-20	12:06:00	4	10	65.747	2.75	0	3
purple tansy	2017-08-20	12:21:00	3	10	65.6605	2.5	1	4
purple tansy	2017-08-20	12:53:00	4	10	65.7725	2.25	0	7
purple tansy	2017-08-20	13:09:00	1	10	63.2825	4	0	5
purple tansy	2017-08-20	13:21:00	3	10	61.862	1.75	0	4
purple tansy	2017-08-20	13:35:00	2	10	63.184	2.25	0	4
purple tansy	2017-08-23	10:35:00	3	10	73.1755	2	2	0
purple tansy	2017-08-23	10:50:00	4	10	71.4325	1.5	1	2
purple tansy	2017-08-23	11:05:00	2	10	68.7795	0	1	0
purple tansy	2017-08-23	11:16:00	1	10	65.765	1	2	0
purple tansy	2017-08-23	14:02:00	1	10	57.479	0.5	2	3
purple tansy	2017-08-23	14:14:00	3	10	57.633	0	3	1
purple tansy	2017-08-23	14:26:00	4	10	57.5975	1	2	4
purple tansy	2017-08-23	14:42:00	2	10	59.3555	0	3	0

## Sheet: alb observed at nest box
surrogate plant	date	replicate	female release rate	number of females observed	number not observed
alfalfa	2016-07-29	1	10	10	0
alfalfa	2016-07-29	2	10	10	0
alfalfa	2016-07-29	3	10	10	0
alfalfa	2016-07-29	4	10	9	1
alfalfa	2016-07-29	1	20	16	4
alfalfa	2016-07-29	2	20	16	4
alfalfa	2016-07-29	3	20	15	5
alfalfa	2016-07-29	4	20	13	7
alfalfa	2016-08-01	1	10	9	1
alfalfa	2016-08-01	2	10	9	1
alfalfa	2016-08-01	3	10	7	3
alfalfa	2016-08-01	4	10	8	2
alfalfa	2016-08-01	1	20	10	10
alfalfa	2016-08-01	2	20	9	11
alfalfa	2016-08-01	3	20	13	7
alfalfa	2016-08-01	4	20	11	9
alfalfa	2016-08-03	1	10	8	2
alfalfa	2016-08-03	2	10	7	3
alfalfa	2016-08-03	3	10	7	3
alfalfa	2016-08-03	4	10	8	2
alfalfa	2016-08-03	1	20	8	12
alfalfa	2016-08-03	2	20	9	11
alfalfa	2016-08-03	3	20	12	8
alfalfa	2016-08-03	4	20	7	13
alfalfa	2016-08-05	1	10	6	4
alfalfa	2016-08-05	2	10	7	3
alfalfa	2016-08-05	3	10	7	3
alfalfa	2016-08-05	4	10	7	3
alfalfa	2016-08-05	1	20	6	14
alfalfa	2016-08-05	2	20	8	12
alfalfa	2016-08-05	3	20	8	12
alfalfa	2016-08-05	4	20	6	14
alfalfa	2016-08-08	1	10	3	7
alfalfa	2016-08-08	2	10	3	7
alfalfa	2016-08-08	3	10	6	4
alfalfa	2016-08-08	4	10	7	3
alfalfa	2016-08-08	1	20	3	17
alfalfa	2016-08-08	2	20	8	12
alfalfa	2016-08-08	3	20	8	12
alfalfa	2016-08-08	4	20	3	17
alfalfa	2016-08-10	1	10	1	9
alfalfa	2016-08-10	2	10	3	7
alfalfa	2016-08-10	3	10	6	4
alfalfa	2016-08-10	4	10	5	5
alfalfa	2016-08-10	1	20	2	18
alfalfa	2016-08-10	2	20	2	18
alfalfa	2016-08-10	3	20	3	17
alfalfa	2016-08-10	4	20	3	17
alfalfa	2016-08-15	1	10	1	9
alfalfa	2016-08-15	2	10	0	10
alfalfa	2016-08-15	3	10	3	7
alfalfa	2016-08-15	4	10	2	8
alfalfa	2016-08-15	1	20	2	18
alfalfa	2016-08-15	2	20	0	20
alfalfa	2016-08-15	3	20	0	20
alfalfa	2016-08-15	4	20	1	19
buckwheat	2016-07-06	1	10	10	0
buckwheat	2016-07-06	2	10	10	0
buckwheat	2016-07-06	3	10	7	3
buckwheat	2016-07-06	4	10	10	0
buckwheat	2016-07-06	1	20	18	2
buckwheat	2016-07-06	2	20	18	2
buckwheat	2016-07-06	3	20	19	1
buckwheat	2016-07-06	4	20	17	3
buckwheat	2016-07-08	1	10	10	0
buckwheat	2016-07-08	2	10	10	0
buckwheat	2016-07-08	3	10	7	3
buckwheat	2016-07-08	4	10	10	0
buckwheat	2016-07-08	1	20	18	2
buckwheat	2016-07-08	2	20	18	2
buckwheat	2016-07-08	3	20	18	2
buckwheat	2016-07-08	4	20	17	3
buckwheat	2016-07-11	1	10	10	0
buckwheat	2016-07-11	2	10	10	0
buckwheat	2016-07-11	3	10	7	3
buckwheat	2016-07-11	4	10	9	1
buckwheat	2016-07-11	1	20	17	3
buckwheat	2016-07-11	2	20	18	2
buckwheat	2016-07-11	3	20	18	2
buckwheat	2016-07-11	4	20	17	3
buckwheat	2016-07-13	1	10	9	1
buckwheat	2016-07-13	2	10	10	0
buckwheat	2016-07-13	3	10	7	3
buckwheat	2016-07-13	4	10	9	1
buckwheat	2016-07-13	1	20	16	4
buckwheat	2016-07-13	2	20	17	3
buckwheat	2016-07-13	3	20	17	3
buckwheat	2016-07-13	4	20	17	3
buckwheat	2016-07-15	1	10	9	1
buckwheat	2016-07-15	2	10	10	0
buckwheat	2016-07-15	3	10	6	4
buckwheat	2016-07-15	4	10	9	1
buckwheat	2016-07-15	1	20	13	7
buckwheat	2016-07-15	2	20	15	5
buckwheat	2016-07-15	3	20	15	5
buckwheat	2016-07-15	4	20	17	3
buckwheat	2016-07-18	1	10	8	2
buckwheat	2016-07-18	2	10	10	0
buckwheat	2016-07-18	3	10	6	4
buckwheat	2016-07-18	4	10	9	1
buckwheat	2016-07-18	1	20	12	8
buckwheat	2016-07-18	2	20	13	7
buckwheat	2016-07-18	3	20	13	7
buckwheat	2016-07-18	4	20	17	3
buckwheat	2016-07-20	1	10	7	3
buckwheat	2016-07-20	2	10	10	0
buckwheat	2016-07-20	3	10	6	4
buckwheat	2016-07-20	4	10	8	2
buckwheat	2016-07-20	1	20	9	11
buckwheat	2016-07-20	2	20	9	11
buckwheat	2016-07-20	3	20	7	13
buckwheat	2016-07-20	4	20	14	6
purple tansy	2017-08-14	1	10	8	2
purple tansy	2017-08-14	2	10	8	2
purple tansy	2017-08-14	3	10	10	0
purple tansy	2017-08-14	4	10	8	2
purple tansy	2017-08-18	1	10	8	2
purple tansy	2017-08-18	2	10	8	2
purple tansy	2017-08-18	3	10	7	3
purple tansy	2017-08-18	4	10	5	5
purple tansy	2017-08-20	1	10	8	2
purple tansy	2017-08-20	2	10	6	4
purple tansy	2017-08-20	3	10	7	3
purple tansy	2017-08-20	4	10	5	5
purple tansy	2017-08-23	1	10	3	7
purple tansy	2017-08-23	2	10	3	7
purple tansy	2017-08-23	3	10	3	7
purple tansy	2017-08-23	4	10	0	10
